# Supplementary material for: Super-stable, solvent-resistant and uniform lignin nanorods and nanospheres with a high yield in a mild and facile process
Source: Royal Society of Chemistry journal article supplement (doi:10.1039/d0gc02887h), 2020-01-01
Supplement: d0gc02887h1.pdf [file d0gc02887h1.pdf]

# Super-stable, Solvent-resistant and Uniform Lignin Nanorods and Nanospheres with a High Yield in a Mild and Facile Process

Weikun Jiang,<sup>\*a,b</sup> Shuyun Liu,<sup>a</sup> Chaojun Wu,<sup>a,b</sup> Yu Liu,<sup>a</sup> Guihua Yang<sup>a</sup> and Yonghao Ni<sup>\*b</sup>

<sup>a</sup> State Key Laboratory of Bio-based Material and Green Papermaking, Qilu University of Technology, Jinan, Shandong 250353, PR China;

<sup>b</sup> Limerick Pulp & Paper Centre & Department of Chemical Engineering, University of New Brunswick, Fredericton, New Brunswick E3B5A3, Canada.

\*Corresponding authors: weikun0709@126.com (W. Jiang), yonghao@unb.ca (Y. Ni).

## Figures

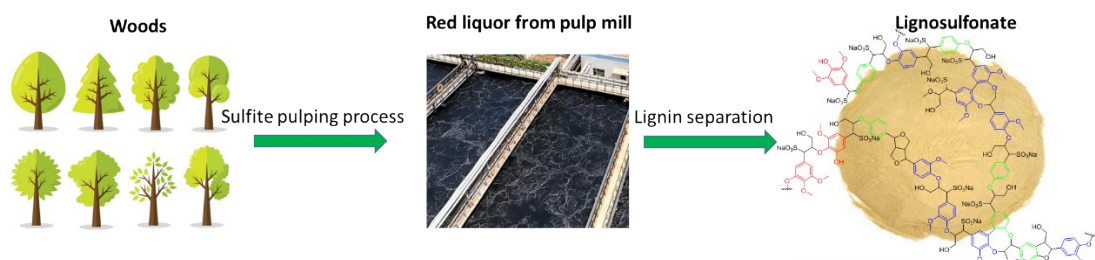

**Figure. S1** Lignosulfonate from the spent liquor (red liquor) of the sulfite pulping process and its structure.

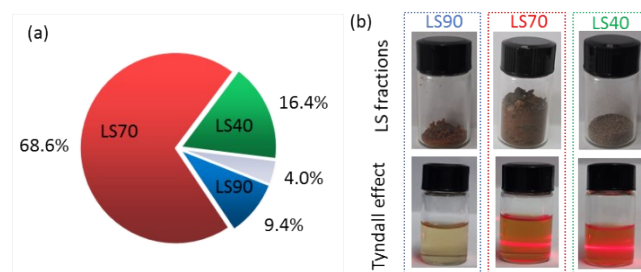

**Figure S2** (a) The yield of each LS fraction. (b) The color of three fractions (top images) and the Tyndall effect photographs of three stable dispersions in ethanol (bottom images).

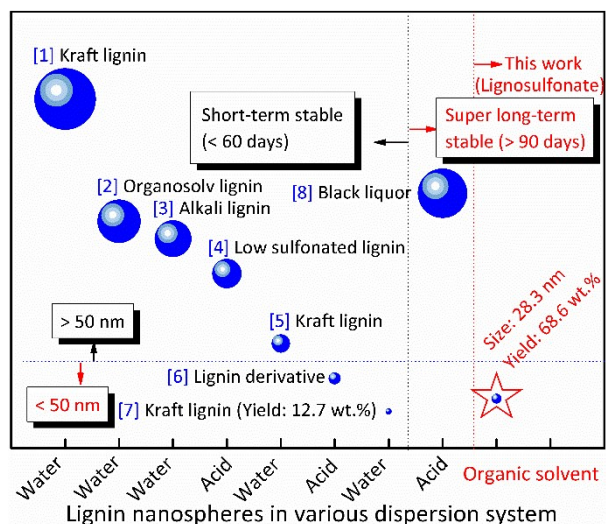

**Figure. S3** Comparison of the raw material, size and stability of lignin nanospheres from this study and those reported in the literature.

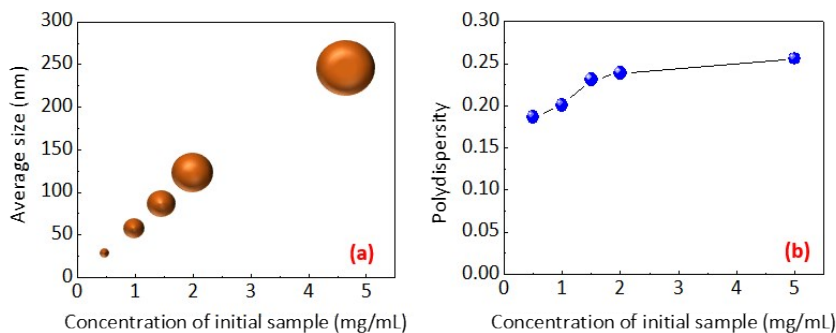

**Figure S4** The average size distributions and polydispersity of lignin nanospheres obtained from LS70 using different initial concentrations.

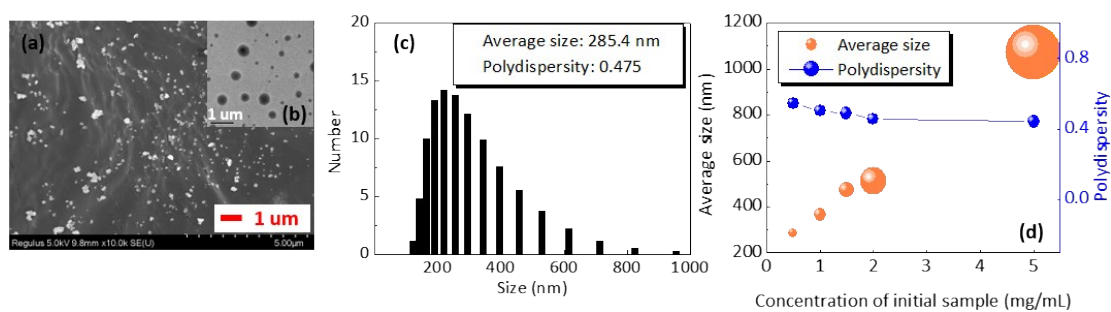

**Figure S5** (a) SEM image, (b) TEM image and (c) average size distributions of the nanospheres obtained from original LS (The concentration of (a), (b) and (c) is 0.5 mg/mL). (d) Variations of size and polydispersity of lignin nanospheres obtained from different initial concentrations.

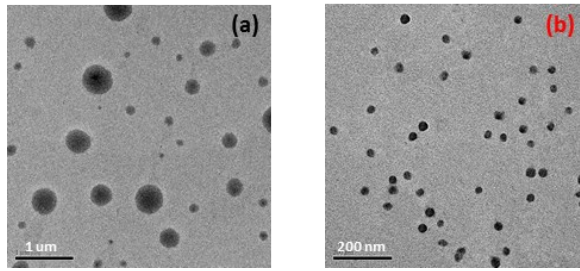

**Figure S6** TEM image of (a) original LS nanospheres and (b) LS70 nanospheres. The initial concentration is 0.5 mg/mL.

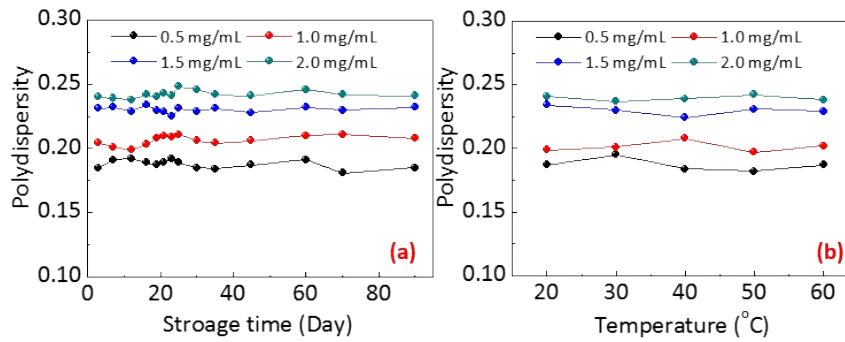

**Figure S7** Long-term-stability in terms of the polydispersity of lignin nanospheres obtained from LS70. (a) 90 days of storage at room temperature ( $\sim 25^\circ\text{C}$ ) in ethanol and (b) at temperature range of 20  $\sim$  60°C.

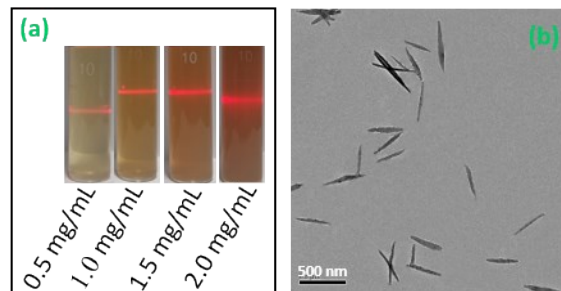

**Figure S8** (a) Photographs (Tyndall effect) of stable dispersion of lignin nanorods obtained from LS40 for 90 days of storage at room temperature ( $\sim 25^\circ\text{C}$ ). (b) The TEM image of lignin nanorods obtained from LS40 for 90 days of storage at room temperature ( $\sim 25^\circ\text{C}$ ).

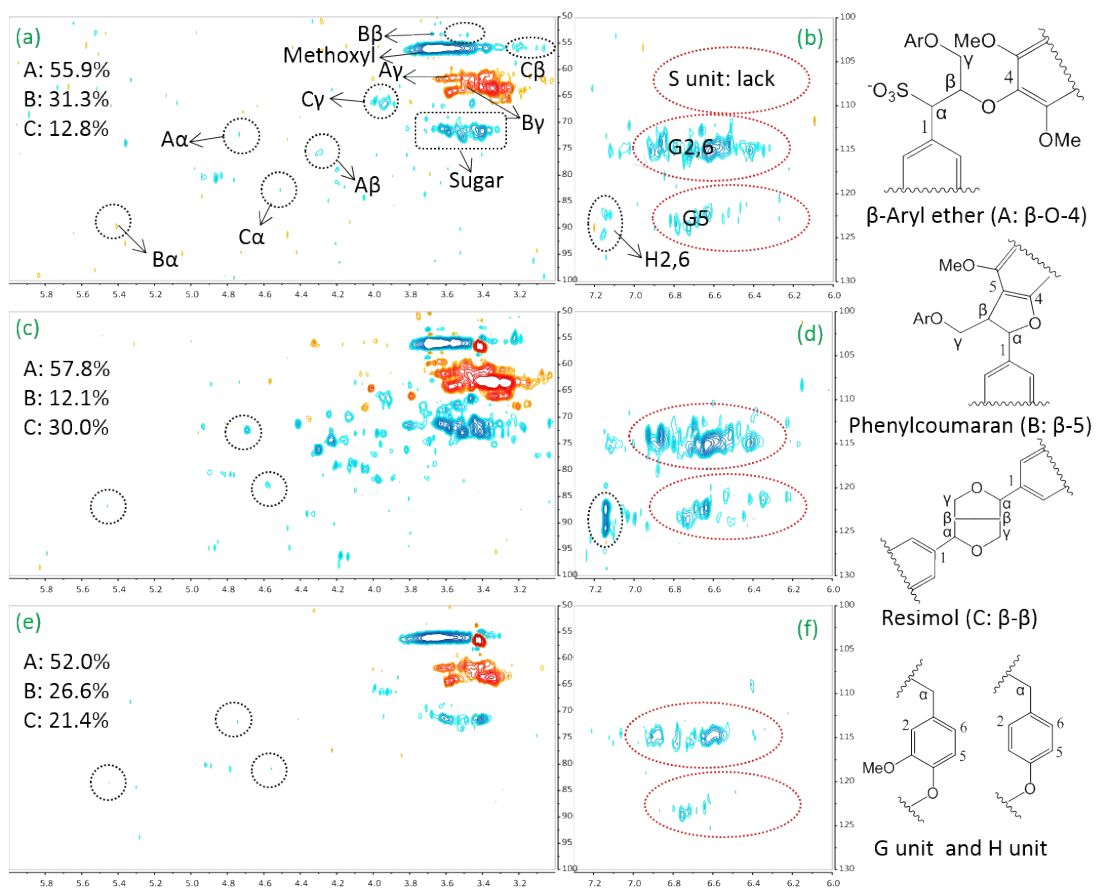

**Figure S9** 2D HSQC NMR spectra of the different LS fractions. LS: (a) and (b); LS70: (c) and (d); LS40: (e) and (f). (Left: Linkage region,  $\delta C/\delta H$  50-100/3.0-6.0 ppm; Right: Aromatic region,  $\delta C/\delta H$  100-130/6.0-7.3 ppm).

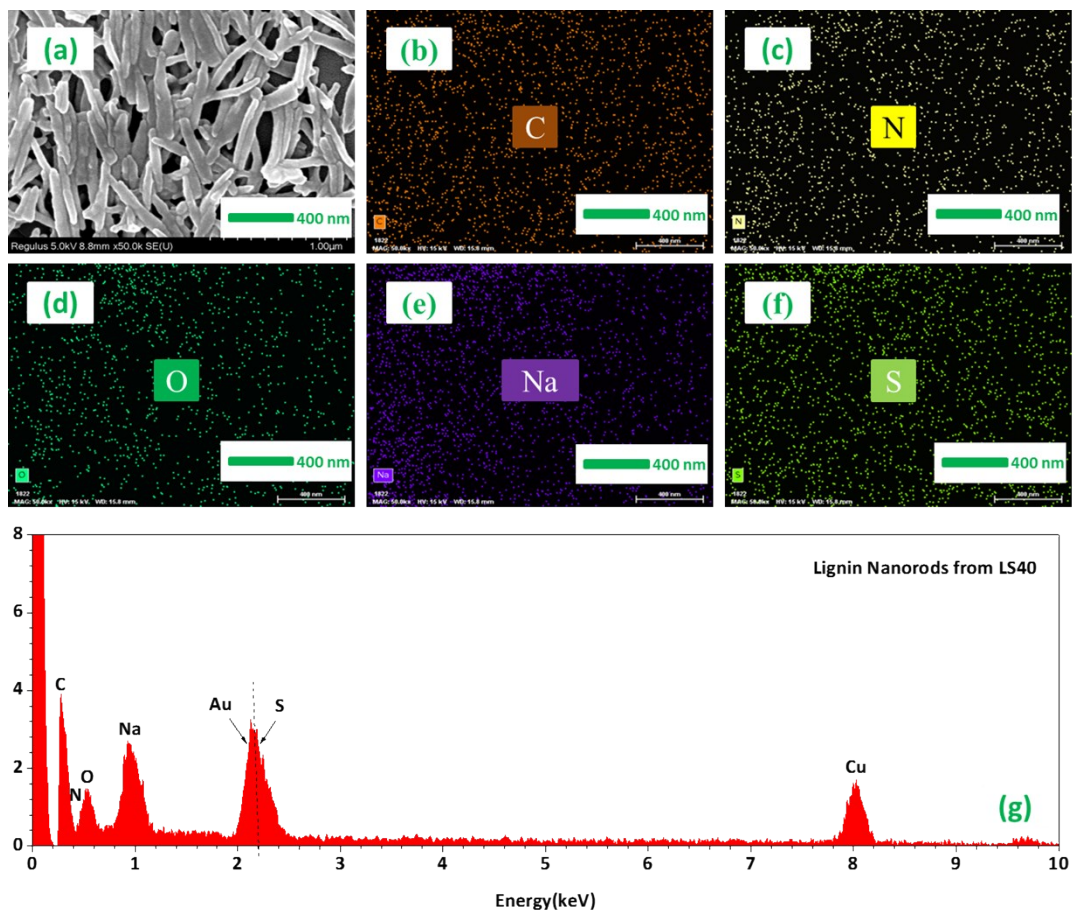

**Figure S10** The energy-dispersive X-ray spectroscopies (EDS) of lignin nanorods. (a) The SEM image of lignin nanorods, (b) ~ (f) the elemental (C, N, O, Na and S) mapping of the lignin nanorod, (g) the corresponding EDS results of lignin nanorods.

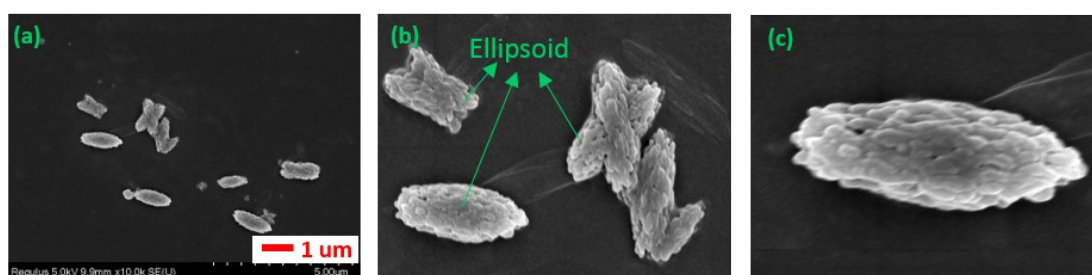

**Figure S11** SEM images of nanorods before dialysis. (The initial concentration is 0.5 mg/mL).

## Table

**Table S1** Elemental analysis of three LS fractions (LS90, LS70 and LS40)

| Sample | Elemental analysis (wt. %) |     |     |      |     |
|--------|----------------------------|-----|-----|------|-----|
|        | C                          | H   | N   | O    | S   |
| LS     | 42.8                       | 4.7 | 1.0 | 37.1 | 6.7 |
| LS90   | 41.8                       | 5.3 | 1.8 | 41.5 | 4.1 |
| LS70   | 46.2                       | 5.3 | 0.8 | 38.8 | 5.2 |
| LS40   | 34.8                       | 4.2 | 0.7 | 41.6 | 9.2 |

## References

1. M. Lievonen, J. J. Valle-Delgado, M. L. Mattinen, E. L. Hult, K. Lintinen, M. A. Kostianen, A. Paananen, G. R. Szilvay, H. Setälä and M. Österberg, *Green Chem.* 2016, **18**, 1416-1422.
2. Z. Liu, N. Hao, S. Shinde, Y. Pu, X. Kang, A. J. Ragauskas and J. S. Yuan, *Green Chem.*, 2019, **21**, 245-260.
3. L. Dai, R. Liu, L. Hu, Z. Zou and C. Si, *ACS Sustainable Chem. Eng.*, 2017, **5**, 8241–8249.
4. C. Frangville, M. Rutkevicius, A. P. Richter, O. D. Velev, S. D. Stoyanov and V. N. Paunov, *ChemPhysChem*, 2012, **13**, 4235–4243.
5. L. Chen, X. Zhou, Y. Shi, B. Gao, J. Wu, T. B. Kirk, J. Xu and W. Xue, *Chem. Eng. J.*, 2018, **346**, 217–225.
6. W. Yang, E. Fortunati, D. Gao, G. M. Balestra, G. Giovanale, X. He, L. Torre, J. M. Kenny and D. Puglia, *ACS Sustainable Chem. Eng.*, 2018, **6**, 3502–3514
7. M. Ma, L. Dai, J. Xu, Z. Liu and Y. Ni, *Green Chem.*, 2020, **22**, 2011-2017.
8. M. Ma, L. Dai, C. Si, L. Hui, Z. Liu and Y. Ni, *ChemSusChem.*, 2019, **12**, 5239-5245.
